# Supplementary material for: Supplementing infant milk formula with a multi-strain synbiotic and osteopontin enhances colonic microbial colonization and modifies jejunal gene expression in lactating piglets
Source: Royal Society of Chemistry journal article supplement (doi:10.1039/d4fo00489b), 2024-01-01
Supplement: d4fo00489b11.pdf [file d4fo00489b11.pdf]

Supplementary materials

**Table S1** Effect of the experimental treatments on jejunal gene expression. Values are expressed compared to a reference sample of the control treatment. The average values of the treatments are expressed without the logarithmic transformation used for the statistical analysis.

| Main Effects | OPN -              |                    | OPN +               |                     | RSE   | <i>p-value</i> |        |             | Function           |
|--------------|--------------------|--------------------|---------------------|---------------------|-------|----------------|--------|-------------|--------------------|
|              | SYN -              | SYN +              | SYN -               | SYN +               |       | SYN            | OPN    | Interaction |                    |
| Genes        | CTR                | SYN                | OPN                 | CON                 |       |                |        |             |                    |
| ALPI         | 1.140 <sup>b</sup> | 2.204 <sup>a</sup> | 1.859 <sup>a</sup>  | 2.091 <sup>a</sup>  | 1.588 | 0.001*         | 0.084  | 0.027*      | Enzyme hormone     |
| ANPEP        | 1.146              | 1.159              | 1.088               | 1.172               | 1.354 | 0.710          | 0.784  | 0.811       | Enzyme hormone     |
| CCK          | 2.07               | 2.252              | 1.823               | 2.655               | 1.581 | 0.025*         | 0.897  | 0.257       | Enzyme hormone     |
| CCL20        | 0.361              | 0.661              | 1.049               | 0.801               | 2.737 | 0.198          | 0.266  | 0.866       | Immune response    |
| CLDN1        | 2.022              | 1.369              | 1.532               | 1.265               | 2.427 | 0.150          | 0.779  | 0.422       | Barrier function   |
| CLDN15       | 0.918              | 0.992              | 0.949               | 1.066               | 1.388 | 0.298          | 0.418  | 0.968       | Barrier function   |
| CLDN4        | 1.188              | 1.179              | 1.141               | 1.171               | 1.848 | 0.958          | 0.800  | 0.844       | Barrier function   |
| CRHR1        | 1.839              | 1.549              | 1.423               | 1.638               | 2.408 | 0.360          | 0.688  | 0.318       | Stress             |
| CXCL2        | 1.286              | 0.543              | 0.586               | 0.829               | 2.194 | 0.066          | 0.307  | 0.075       | Immune response    |
| DAO1         | 0.913              | 1.164              | 1.098               | 1.132               | 1.450 | 0.175          | 0.342  | 0.169       | Enzyme hormone     |
| FAXDC2       | 1.465              | 2.899              | 2.1                 | 2.525               | 2.530 | 0.091          | 0.662  | 0.182       | Immune response    |
| GBP1         | 1.415              | 0.781              | 0.9                 | 0.9                 | 2.289 | 0.045*         | 0.347  | 0.217       | Immune response    |
| GCG          | 0.924              | 0.891              | 1.13                | 1.129               | 1.468 | 0.883          | 0.040* | 0.900       | Enzyme hormone     |
| GPX2         | 1.826              | 1.433              | 1.868               | 1.433               | 2.094 | 0.091          | 0.846  | 0.957       | Enzyme hormone     |
| HNMT         | 1.954              | 1.563              | 1.844               | 1.724               | 1.451 | 0.312          | 0.956  | 0.250       | Enzyme hormone     |
| HSD11B1      | 2.3                | 1.525              | 1.675               | 1.872               | 1.721 | 0.383          | 0.631  | 0.059       | Stress             |
| HSPA4        | 1.458              | 1.25               | 1.266               | 1.33                | 1.456 | 0.555          | 0.674  | 0.207       | Immune response    |
| HSPB1        | 1.616              | 1.494              | 1.476               | 1.62                | 1.462 | 0.865          | 0.961  | 0.469       | Immune response    |
| IDO1         | 1.364 <sup>a</sup> | 0.284 <sup>b</sup> | 0.458 <sup>ab</sup> | 0.466 <sup>ab</sup> | 5.198 | 0.024*         | 0.372  | 0.035*      | Enzyme hormone     |
| IFNG         | 3.15               | 1.002              | 1.151               | 1.618               | 4.136 | 0.082          | 0.902  | 0.145       | Immune response    |
| IFNGR1       | 1.356              | 1.455              | 1.406               | 1.506               | 1.361 | 0.373          | 0.662  | 0.973       | Immune response    |
| IGF1R        | 1.382              | 1.112              | 1.212               | 1.343               | 1.437 | 0.300          | 0.687  | 0.202       | Enzyme hormone     |
| IL10         | 3.011              | 2.181              | 2.509               | 1.927               | 1.918 | 0.148          | 0.654  | 0.547       | Immune response    |
| IL17A        | 0.773              | 0.663              | 0.615               | 0.921               | 2.484 | 0.885          | 0.519  | 0.608       | Immune response    |
| IL1beta      | 1.276 <sup>a</sup> | 0.406 <sup>b</sup> | 0.393 <sup>b</sup>  | 0.560 <sup>b</sup>  | 2.389 | 0.036*         | 0.053  | 0.027*      | Immune response    |
| IL22         | 1.076              | 0.614              | 0.612               | 1.047               | 2.664 | 0.549          | 0.462  | 0.166       | Immune response    |
| IL6          | 2.899              | 1.103              | 1.379               | 1.356               | 2.304 | 0.050          | 0.356  | 0.103       | Immune response    |
| IL8          | 0.874              | 0.548              | 0.63                | 0.724               | 1.698 | 0.220          | 0.633  | 0.092       | Immune response    |
| MUC13        | 0.815              | 1.116              | 0.988               | 0.871               | 1.506 | 0.492          | 0.605  | 0.015*      | Barrier function   |
| MUC2         | 1.299              | 1.008              | 1.094               | 1.291               | 1.385 | 0.447          | 0.877  | 0.040*      | Barrier function   |
| NR3C1        | 1.344              | 1.423              | 1.264               | 1.42                | 1.266 | 0.192          | 0.783  | 0.729       | Stress             |
| OCLN         | 1.202              | 1.571              | 1.383               | 1.441               | 1.302 | 0.041*         | 0.815  | 0.212       | Barrier function   |
| PPARGC1alfa  | 0.967              | 1.058              | 0.785               | 0.827               | 1.550 | 0.400          | 0.253  | 0.664       | Barrier function   |
| PYY          | 0.993              | 1.166              | 1.014               | 1.172               | 1.526 | 0.194          | 0.806  | 0.945       | Enzyme hormone     |
| REG3G        | 5.741              | 6.127              | 6.78                | 7.876               | 6.391 | 0.390          | 0.168  | 0.463       | Immune response    |
| SI           | 2.286 <sup>b</sup> | 4.729 <sup>a</sup> | 2.771 <sup>ab</sup> | 3.569 <sup>ab</sup> | 1.884 | 0.004*         | 0.840  | 0.026*      | Enzyme hormone     |
| SLC11A2      | 1.503              | 1.307              | 1.409               | 1.285               | 1.281 | 0.096          | 0.702  | 0.874       | Nutrient transport |
| SLC13A1      | 0.666 <sup>b</sup> | 1.086 <sup>a</sup> | 0.934 <sup>ab</sup> | 1.113 <sup>a</sup>  | 2.255 | 0.026*         | 0.072  | 0.073       | Nutrient transport |
| SLC15A1      | 1.632 <sup>b</sup> | 2.440 <sup>a</sup> | 1.893 <sup>ab</sup> | 2.171 <sup>ab</sup> | 1.490 | 0.010*         | 0.731  | 0.166       | Nutrient transport |

|                 |                    |                    |                     |                     |       |        |       |        |                    |
|-----------------|--------------------|--------------------|---------------------|---------------------|-------|--------|-------|--------|--------------------|
| <b>SLC16A1</b>  | 1.398              | 1.187              | 1.137               | 1.204               | 1.457 | 0.674  | 0.252 | 0.283  | Nutrient transport |
| <b>SLC30A1</b>  | 1.498              | 1.508              | 1.466               | 1.636               | 1.372 | 0.408  | 0.737 | 0.467  | Nutrient transport |
| <b>SLC39A4</b>  | 1.24               | 1.753              | 1.5                 | 1.529               | 1.448 | 0.146  | 0.566 | 0.072  | Nutrient transport |
| <b>SLC5A1</b>   | 1.694 <sup>b</sup> | 2.791 <sup>a</sup> | 1.844 <sup>ab</sup> | 2.349 <sup>ab</sup> | 1.668 | 0.005* | 0.909 | 0.215  | Nutrient transport |
| <b>SLC7A8</b>   | 1.077              | 2.604              | 2.375               | 3.175               | 3.187 | 0.043* | 0.296 | 0.082  | Nutrient transport |
| <b>SOD2 m</b>   | 1.321              | 0.96               | 1.07                | 1.058               | 1.402 | 0.103  | 0.423 | 0.121  | Enzyme hormone     |
| <b>TFF3</b>     | 1.313              | 1.124              | 1.368               | 1.327               | 1.512 | 0.836  | 0.682 | 0.564  | Barrier function   |
| <b>TGFbeta1</b> | 1.550 <sup>a</sup> | 0.904 <sup>b</sup> | 0.916 <sup>b</sup>  | 1.105 <sup>ab</sup> | 1.583 | 0.108  | 0.163 | 0.010* | Barrier function   |
| <b>TLR2</b>     | 0.817              | 0.431              | 0.635               | 0.651               | 2.178 | 0.073  | 0.911 | 0.171  | Immune response    |
| <b>TLR4</b>     | 2.542 <sup>a</sup> | 1.297 <sup>b</sup> | 1.577 <sup>ab</sup> | 1.620 <sup>ab</sup> | 1.755 | 0.068  | 0.465 | 0.017* | Immune response    |
| <b>TNFalfa</b>  | 1.796              | 1.04               | 1.146               | 1.238               | 1.884 | 0.137  | 0.292 | 0.166  | Immune response    |
| <b>ZO1</b>      | 1.323              | 1.109              | 1.196               | 1.239               | 1.351 | 0.261  | 0.823 | 0.265  | Barrier function   |

CTR: no additives in the diet; SYN: prebiotic+probiotic additives in the diet; OPN: osteopontin in the diet; CON: symbiotic + osteopontin in the diet. n=8. Gene abbreviations detailed in Supplementary materials (Table S2). \*Indicates p < 0.05 and statistical difference present. <sup>a,b</sup> Indicate statistically significant differences between means. SEM, standard error of the mean.

**Table S2** List of 56 genes (abbreviation, name and function group) used for gene expression analysis using Open Array Real-Time PCR custom designed.

| <b>Genes</b>       | <b>Name</b>                                                            | <b>Function group</b> |
|--------------------|------------------------------------------------------------------------|-----------------------|
| <b>ALPI</b>        | Intestinal alkaline phosphatase                                        | Enzyme hormone        |
| <b>ANPEP</b>       | Alanyl aminopeptidase membrane                                         | Enzyme hormone        |
| <b>CCK</b>         | Cholecystokinin                                                        | Enzyme hormone        |
| <b>CCL20</b>       | Chemokine (C-C motif) ligand 20                                        | Immune response       |
| <b>CLDN1</b>       | Claudin-1                                                              | Barrier function      |
| <b>CLDN15</b>      | Claudin-15                                                             | Barrier function      |
| <b>CLDN4</b>       | Claudin-4                                                              | Barrier function      |
| <b>CRHR1</b>       | Corticotropin releasing hormone receptor 1                             | Stress                |
| <b>CXCL2</b>       | Chemokine (C-X-C motif) ligand 2                                       | Immune response       |
| <b>DAO1</b>        | Diamine oxidase                                                        | Enzyme hormone        |
| <b>FAXDC2</b>      | Fatty acid hydrolase domain containing 2                               | Immune response       |
| <b>GBP1</b>        | Guanylate binding protein 1                                            | Immune response       |
| <b>GCG</b>         | Glucagon                                                               | Enzyme hormone        |
| <b>GPX2</b>        | Glutathione peroxidase 2                                               | Enzyme hormone        |
| <b>HNMT</b>        | Histamine N-methyltransferase                                          | Enzyme hormone        |
| <b>HSD11B1</b>     | Hydroxysteroid (11-beta) dehydrogenase 1                               | Stress                |
| <b>HSPA4</b>       | Heat shock protein 70                                                  | Immune response       |
| <b>HSPB1</b>       | heat shock protein 27                                                  | Immune response       |
| <b>IDO1</b>        | Indoleamine 2,3-dioxygenase                                            | Enzyme hormone        |
| <b>IFNG</b>        | Interferon gamma                                                       | Immune response       |
| <b>IFNGR1</b>      | Interferon gamma receptor 1                                            | Immune response       |
| <b>IGF1R</b>       | Insulin-like growth factor 1 receptor                                  | Enzyme hormone        |
| <b>IL10</b>        | Interleukin 10                                                         | Immune response       |
| <b>IL17A</b>       | Interleukin 17 A                                                       | Immune response       |
| <b>IL1beta</b>     | Interleukin 1 beta                                                     | Immune response       |
| <b>IL22</b>        | Interleukin 22                                                         | Immune response       |
| <b>IL6</b>         | Interleukin 6                                                          | Immune response       |
| <b>IL8</b>         | Interleukin 8                                                          | Immune response       |
| <b>MUC13</b>       | Mucin 13                                                               | Barrier function      |
| <b>MUC2</b>        | Mucin 2                                                                | Barrier function      |
| <b>NR3C1</b>       | Glucocorticoid receptor                                                | Stress                |
| <b>OCLN</b>        | Ocludin                                                                | Barrier function      |
| <b>PPARGC1alfa</b> | Peroxisome proliferative activated receptor gamma, coactivator 1 alpha | Immune response       |
| <b>PYY</b>         | Peptide tyrosine tyrosine                                              | Enzyme hormone        |
| <b>REG3G</b>       | Regenerating-islet derived protein 3 gamma                             | Immune response       |
| <b>SI</b>          | Sucrase-isomaltase                                                     | Enzyme hormone        |

|                 |                                                                                   |                    |
|-----------------|-----------------------------------------------------------------------------------|--------------------|
| <b>SLC11A2</b>  | Solute carrier family 11 (proton-coupled divalent metal ion transporter) member 2 | Nutrient transport |
| <b>SLC13A1</b>  | Solute carrier family 13 (sodium/sulfate symporters) member 1                     | Nutrient transport |
| <b>SLC15A1</b>  | Solute carrier family 15 (oligopeptide transporter) member 1                      | Nutrient transport |
| <b>SLC16A1</b>  | Monocarboxylate transporter 1                                                     | Nutrient transport |
| <b>SLC30A1</b>  | Solute carrier family 30 (zinc transporter) member 1                              | Nutrient transport |
| <b>SLC39A4</b>  | Solute carrier family 39 (zinc transporter) member 4                              | Nutrient transport |
| <b>SLC5A1</b>   | Solute carrier family 5 (sodium/glucose cotransporter) member 1                   | Nutrient transport |
| <b>SLC7A8</b>   | Solute carrier family 7 (amino acid transporter light chain, L System) member 8   | Nutrient transport |
| <b>SOD2</b>     | Superoxide dismutase                                                              | Enzyme hormone     |
| <b>TFF3</b>     | Trefoil factor 3                                                                  | Barrier function   |
| <b>TGFbeta1</b> | Transforming growth factor beta 1                                                 | Immune response    |
| <b>TLR2</b>     | Toll-like receptor 2                                                              | Immune response    |
| <b>TLR4</b>     | Toll-like receptor 4                                                              | Immune response    |
| <b>TNFalfa</b>  | Tumor necrosis factor alpha                                                       | Immune response    |
| <b>ZO1</b>      | Zonula occludens 1                                                                | Barrier function   |

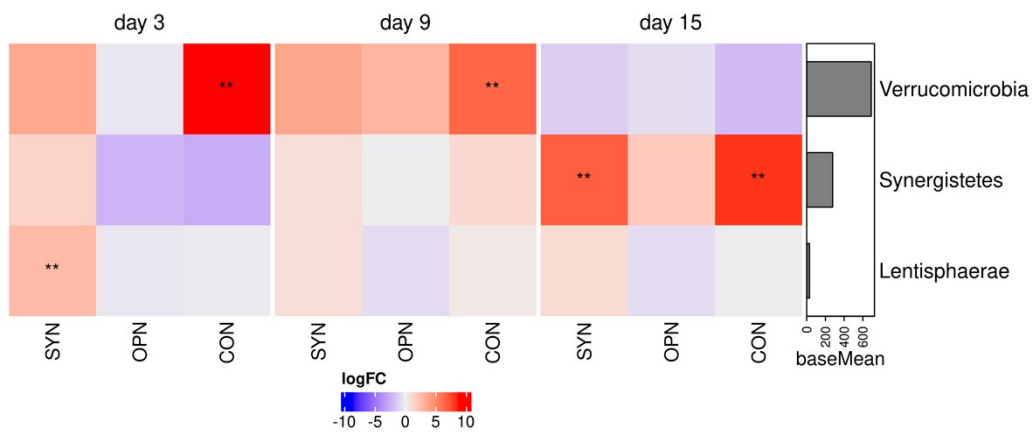

**Figure S1** Heatmap of the impact of experimental treatments on bacterial phyla observed in faecal samples on various sampling days (3, 9 and 15). CTR: no additives in the diet; SYN: prebiotic + probiotic additives in the diet; OPN: osteopontin in the diet; CON: synbiotic + osteopontin in the diet. n = 8. \* Indicates  $p < 0.1$ ; \*\* indicates  $p < 0.05$ .

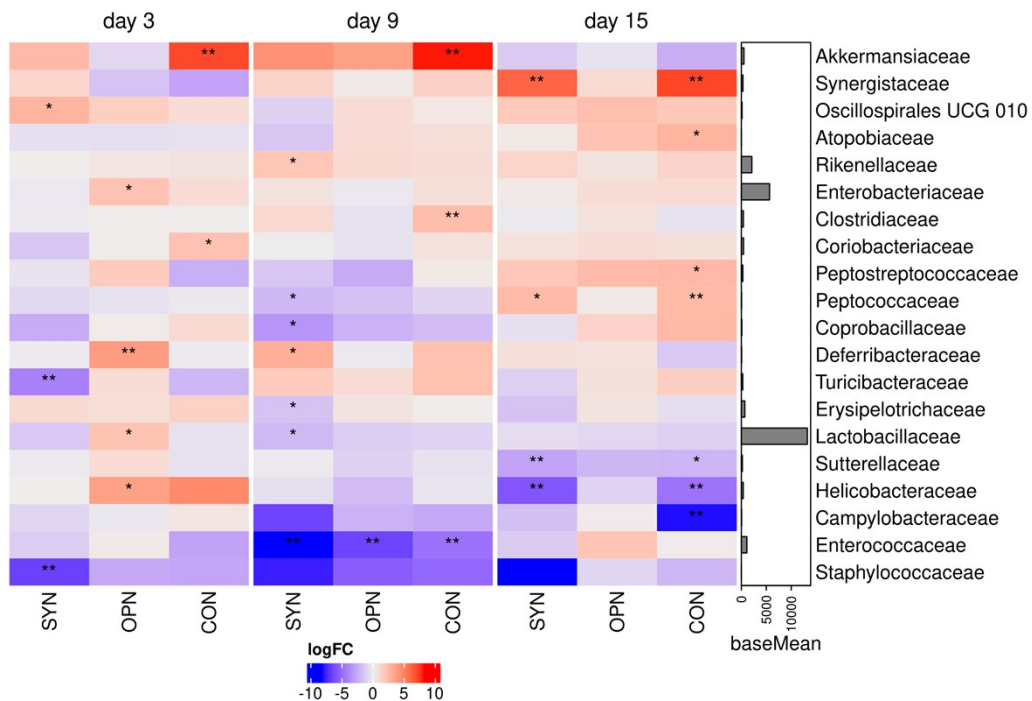

**Figure S2** Heatmap of the impact of experimental treatments on bacterial families observed in faecal samples on various sampling days (3, 9 and 15). CTR: no additives in the diet; SYN: prebiotic + probiotic additives in the diet; OPN: osteopontin in the diet; CON: synbiotic + osteopontin in the diet. n = 8. \* Indicates  $p < 0.1$ ; \*\* indicates  $p < 0.05$ .

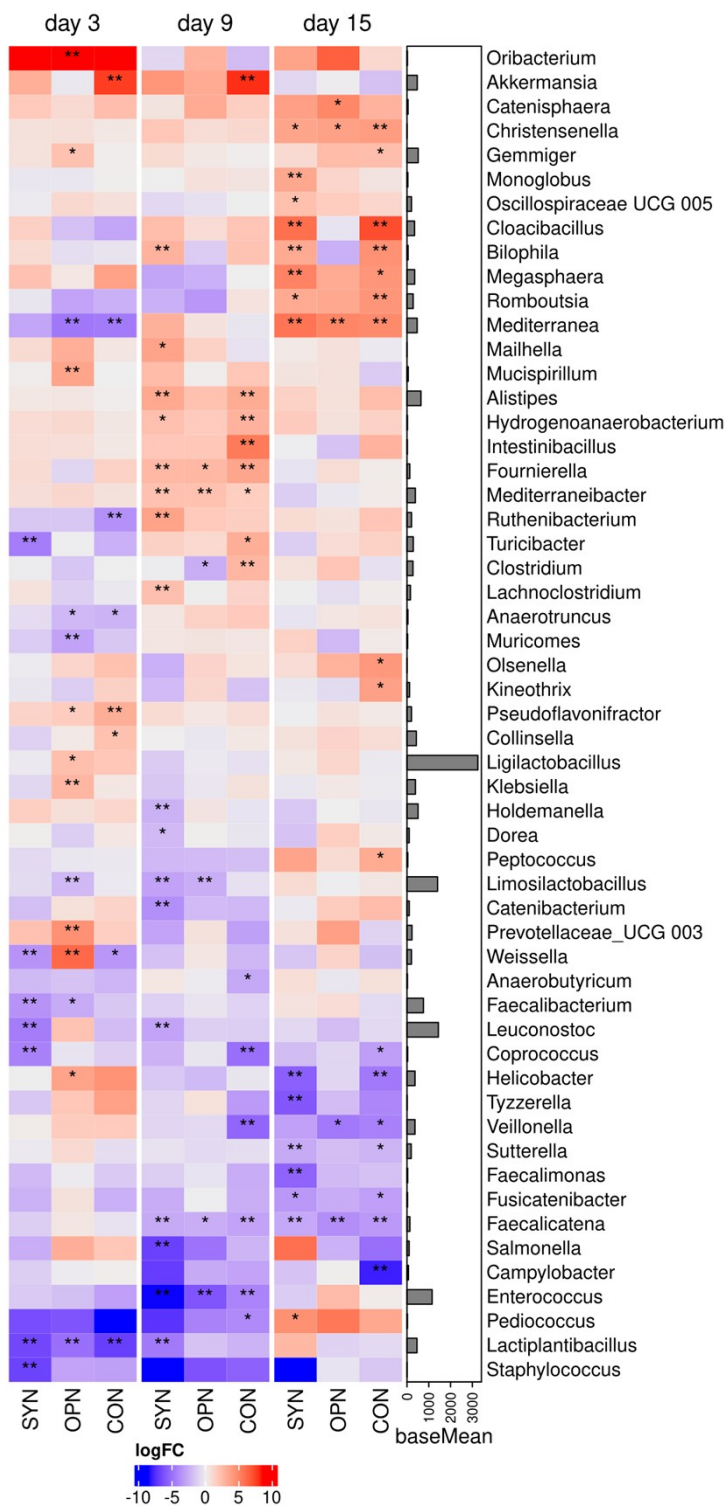

**Figure S3** Heatmap of the impact of experimental treatments on bacterial genera observed in faecal samples on various sampling days (3, 9 and 15). CTR: no additives in the diet; SYN: prebiotic + probiotic additives in the diet; OPN: osteopontin in the diet; CON: synbiotic + osteopontin in the diet. n = 8. \* Indicates  $p < 0.1$ ; \*\* indicates  $p < 0.05$ .

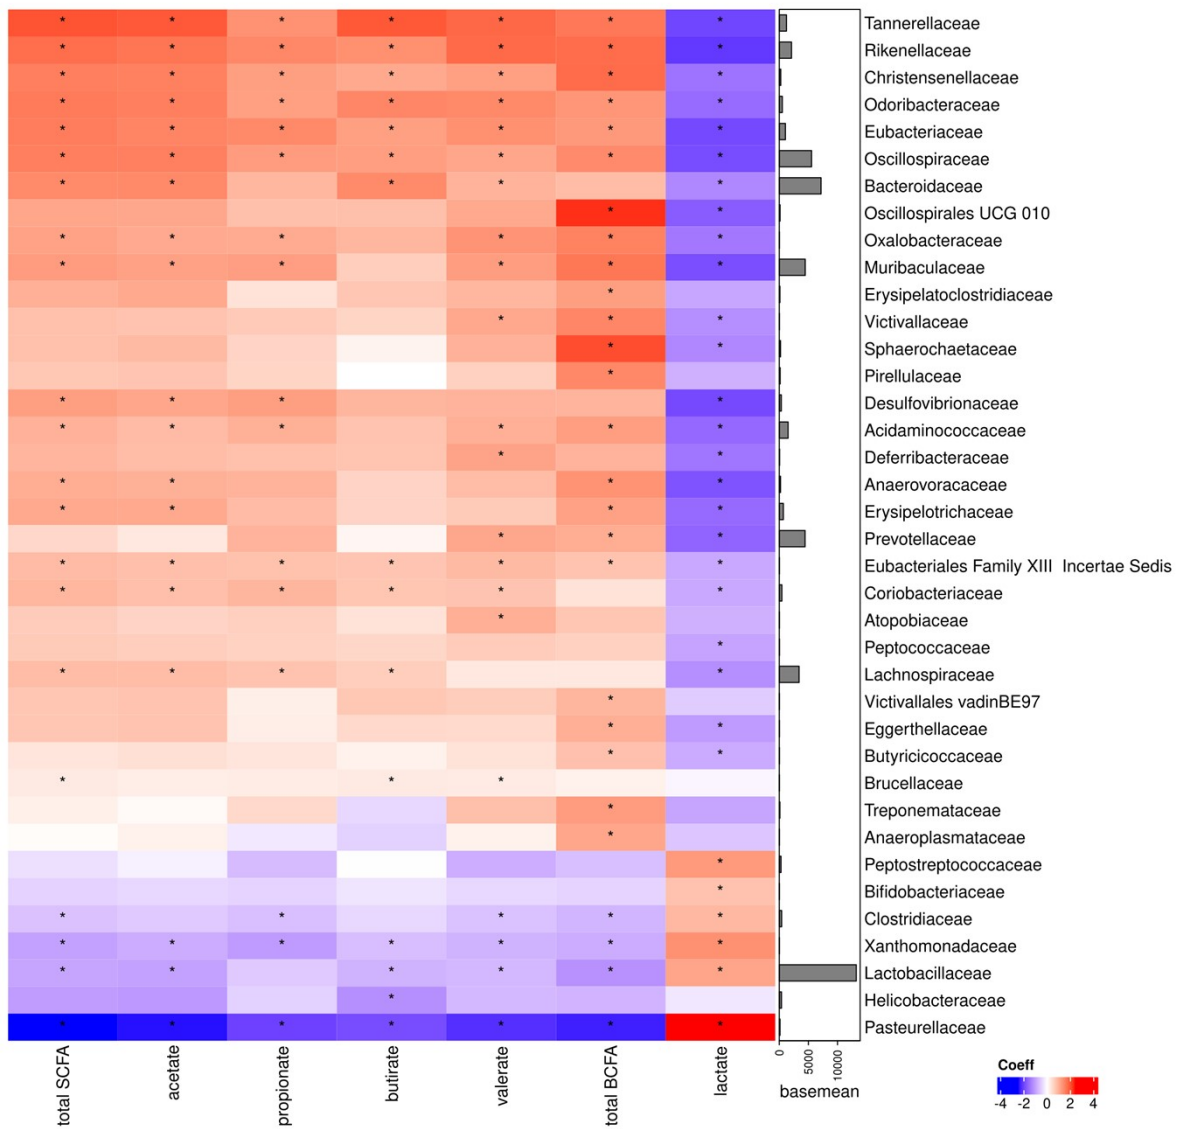

**Figure S4** Heatmap of correlations between colonic Short-Chain Fatty Acids (SCFA) concentration and bacterial families detected on faecal samples from day 15. BCFA, Branched-chain fatty acids. \*Indicates  $p < 0.05$  and statistical difference present.

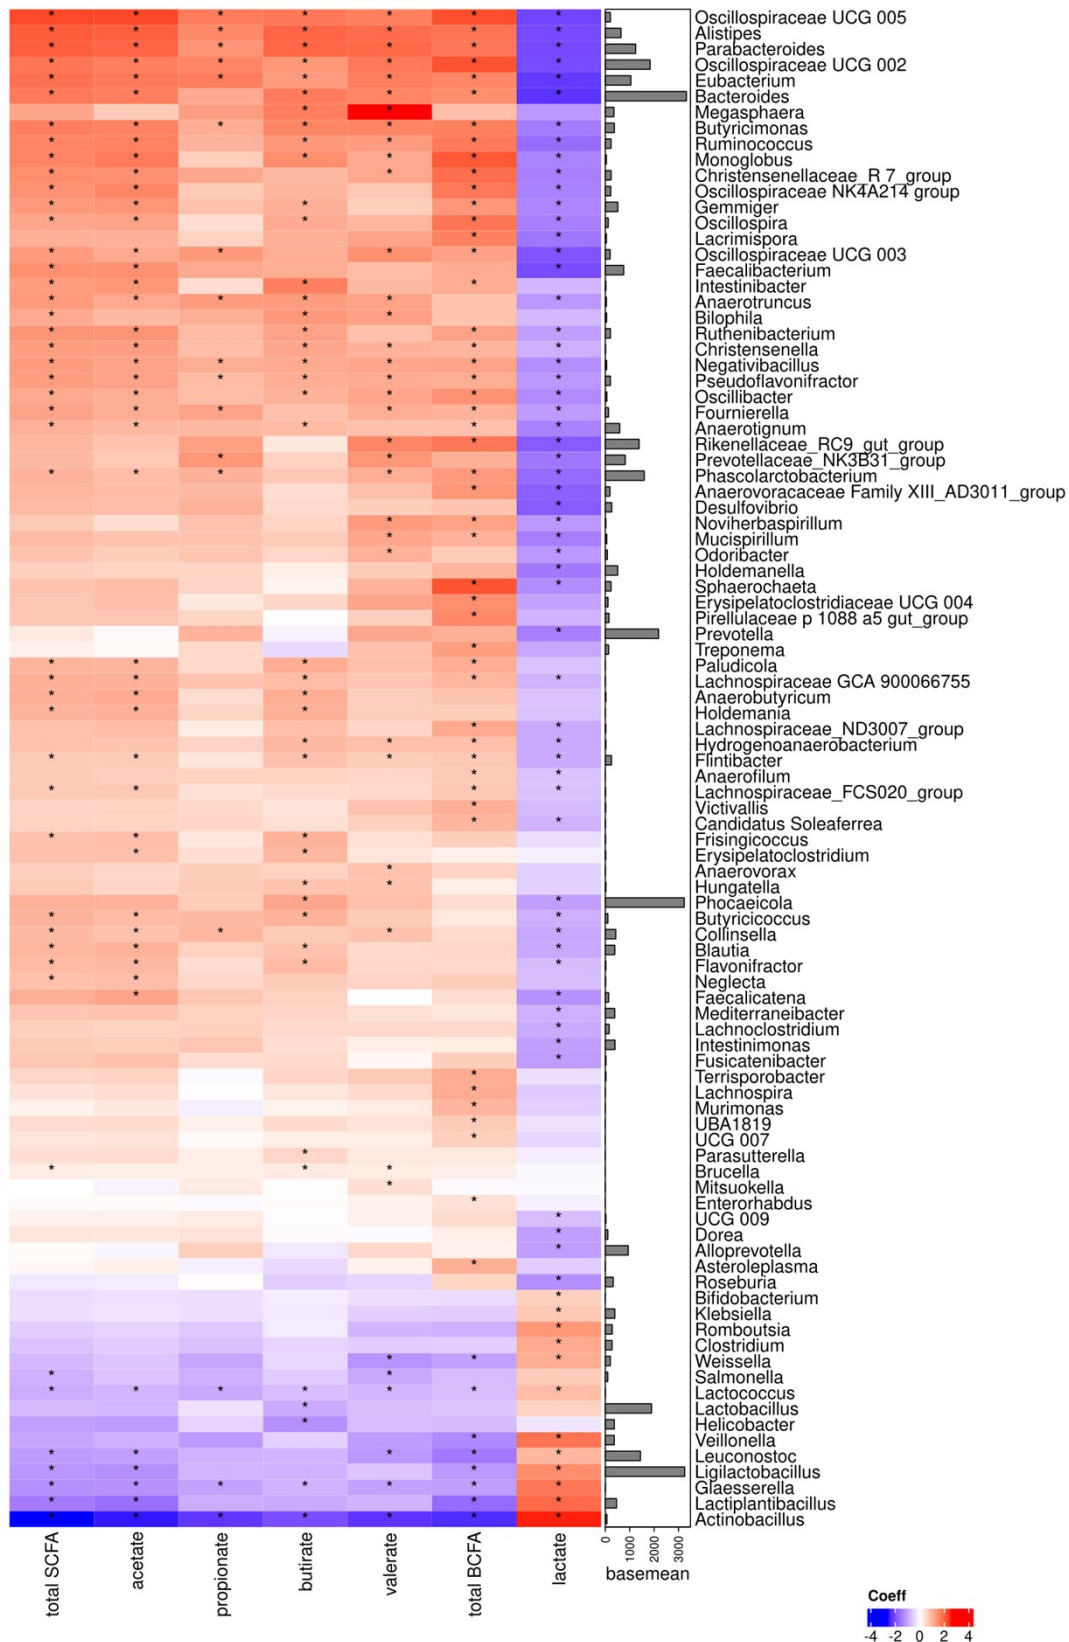

**Figure S5** Heatmap of correlations between colonic Short-Chain Fatty Acids (SCFA) concentration and bacterial genera detected on faecal samples from day 15. BCFA, Branched-chain fatty acids. \*Indicates  $p < 0.05$  and statistical difference present.

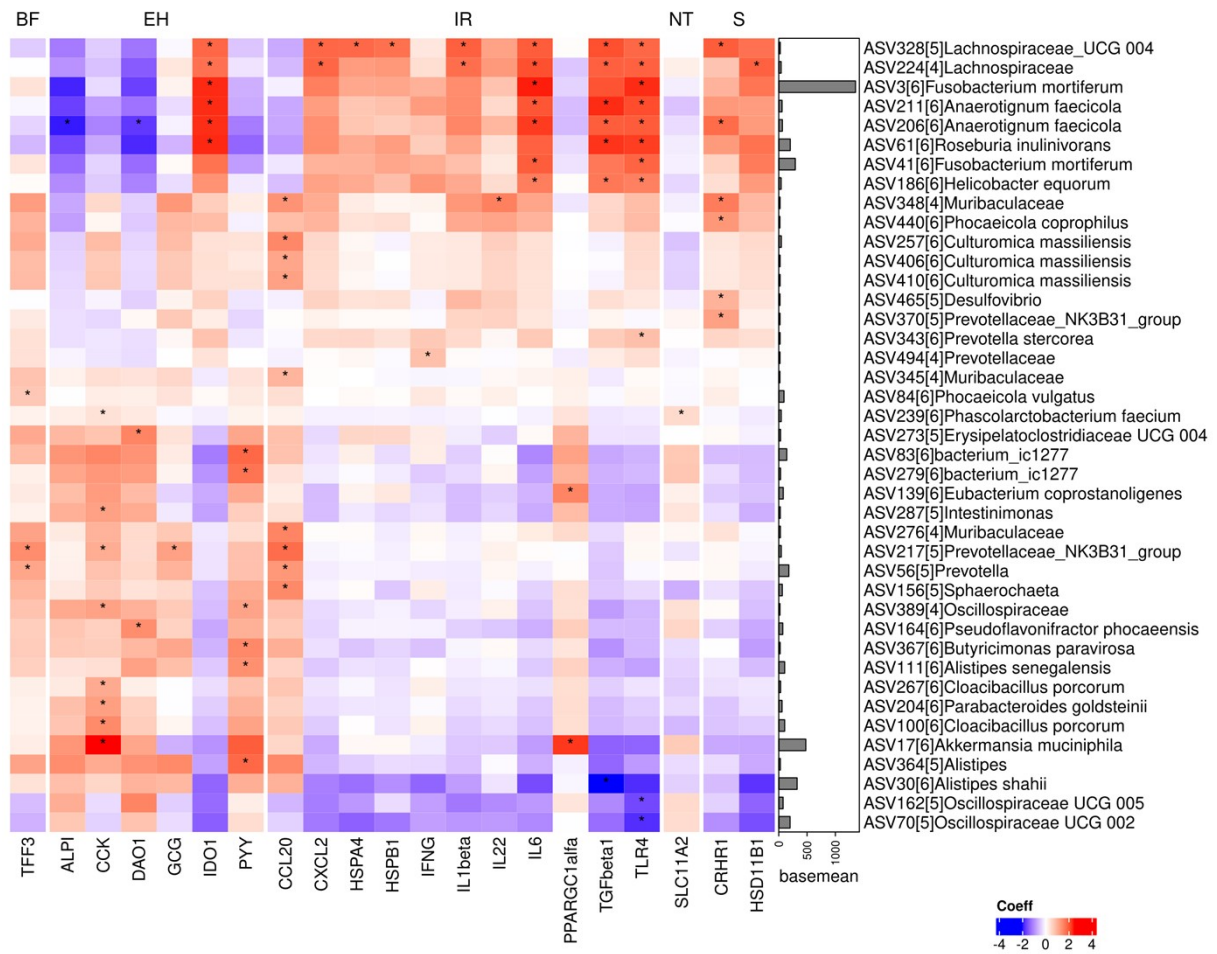

**Figure S6** Heatmap of correlations between jejunum gene expression and ASVs detected on faecal samples from day 15. \*Indicates  $p < 0.05$  and statistical difference present.



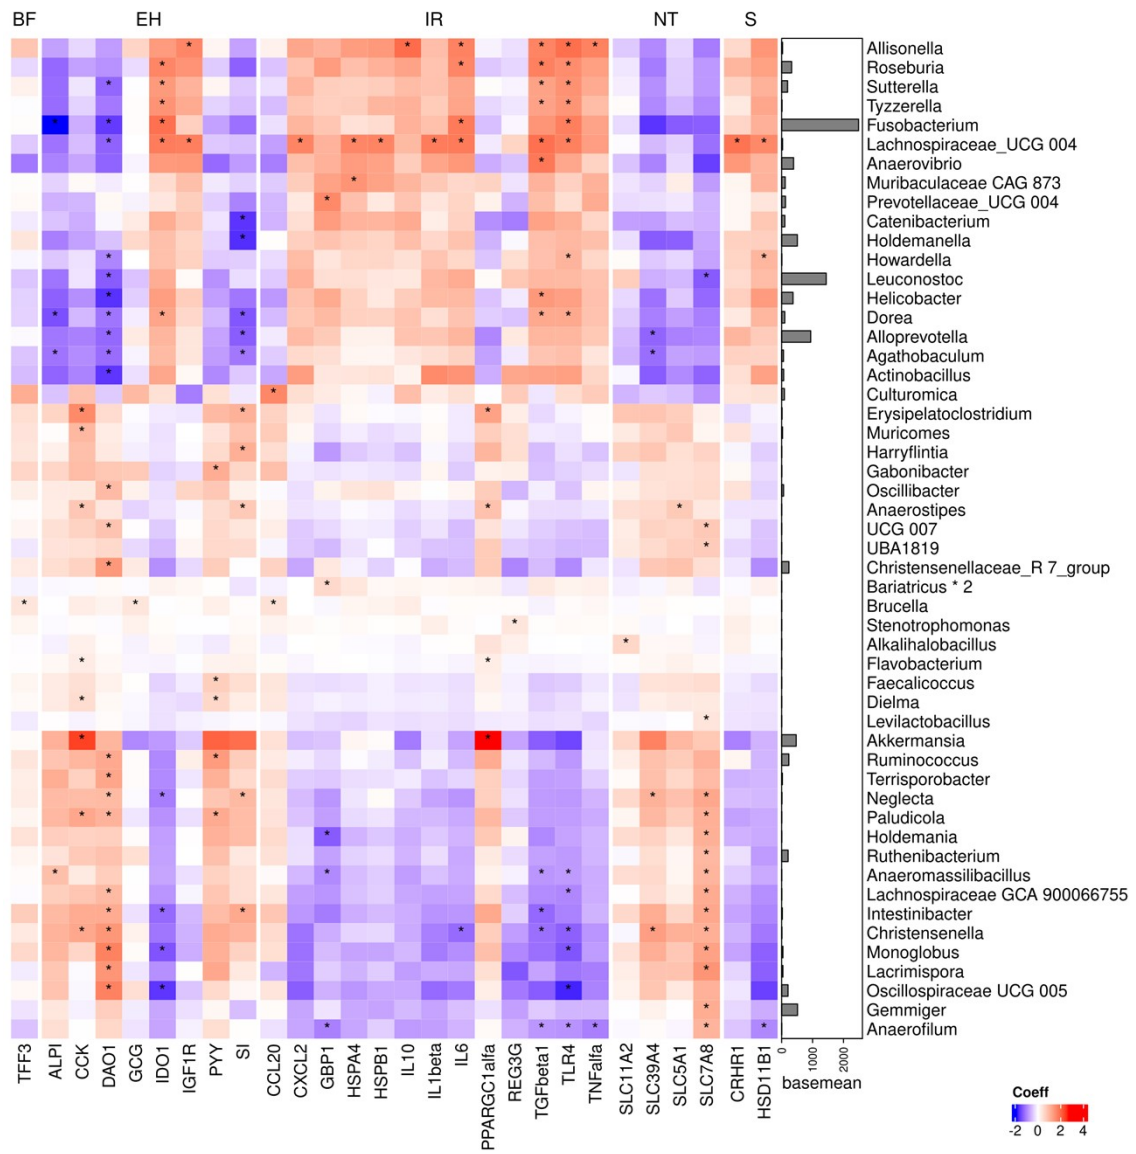

**Figure S7** Heatmap of correlations between jejunal gene expression and bacterial genera detected on faecal samples from day 15. \*Indicates  $p < 0.05$  and statistical difference present.

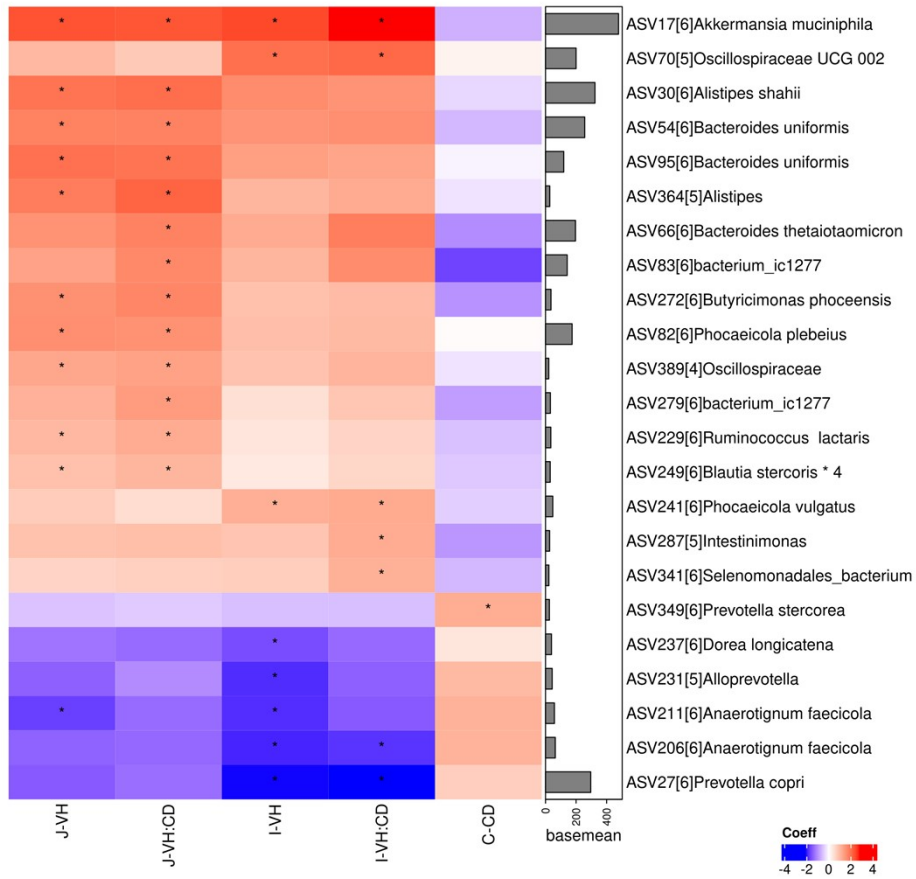

**Figure S8** Heatmap of correlations between histology (jejunal, ileal and colonic) and ASVs detected on faecal samples from day 15. J=jejunal, I=ileal, C=colonic. VH=villus height; CD=crypt depth; VH.CD=ratio villus height:crypt depth. \*Indicates p < 0.05 and statistical difference present.

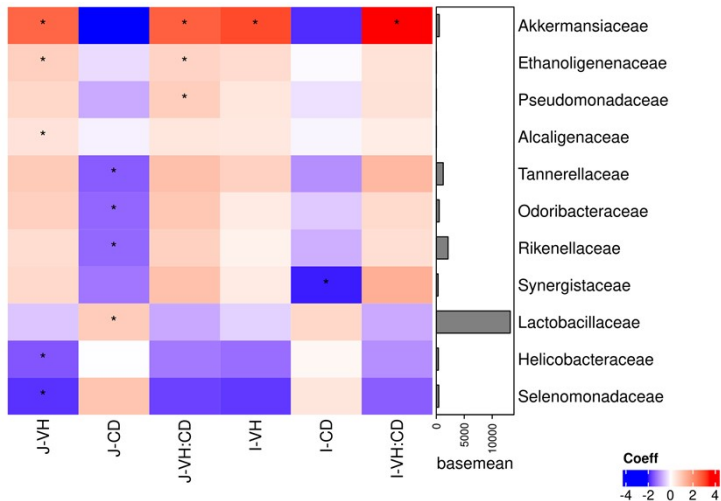

**Figure S9** Heatmap of correlations between histology (jejunal and ileal) and bacterial families detected on faecal samples from day 15. J=jejunum, I=ileum. VH=villus height; CD=crypt depth; VH.CD=ratio villus height:crypt depth. \*Indicates p < 0.05 and statistical difference present.
