# Supplementary figures and images for: Supplementing infant milk formula with a multi-strain synbiotic and osteopontin enhances colonic microbial colonization and modifies jejunal gene expression in lactating piglets
Source: Royal Society of Chemistry journal article supplement (doi:10.1039/d4fo00489b), 2024-01-01

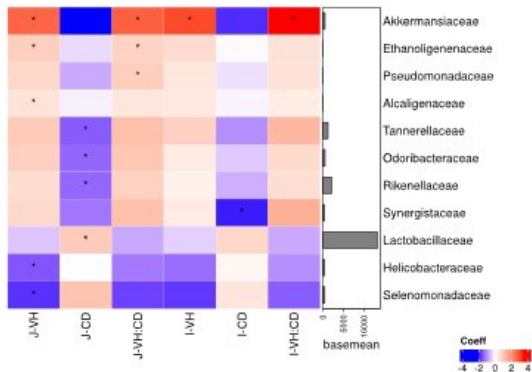

Supplement: d4fo00489b10.pdf [file d4fo00489b10.pdf]

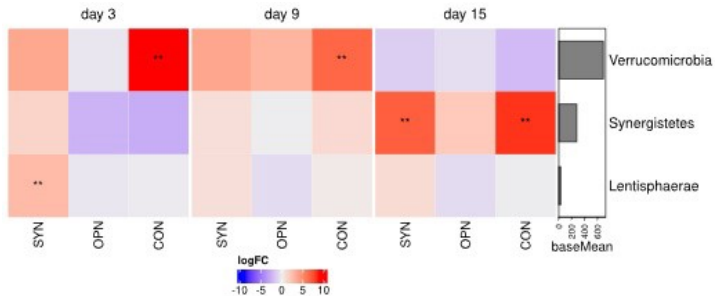

Supplement: d4fo00489b2.pdf [file d4fo00489b2.pdf]

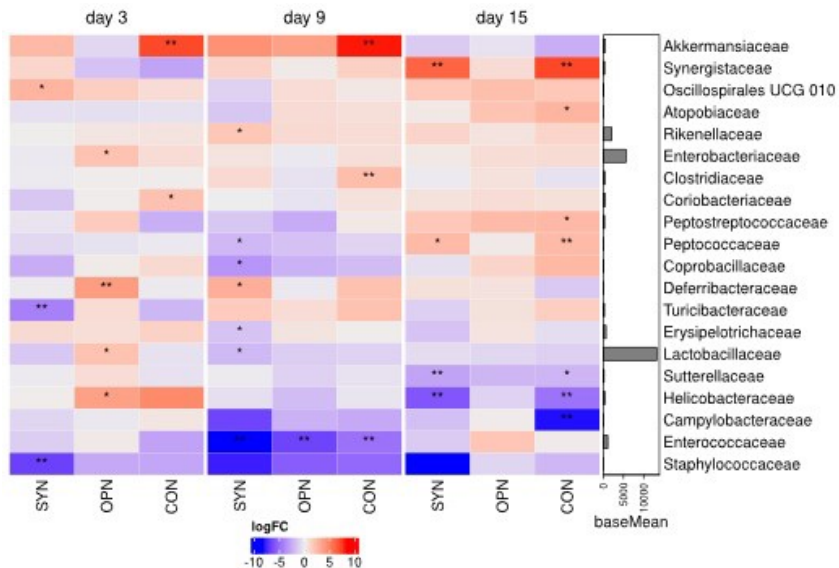

Supplement: d4fo00489b3.pdf [file d4fo00489b3.pdf]

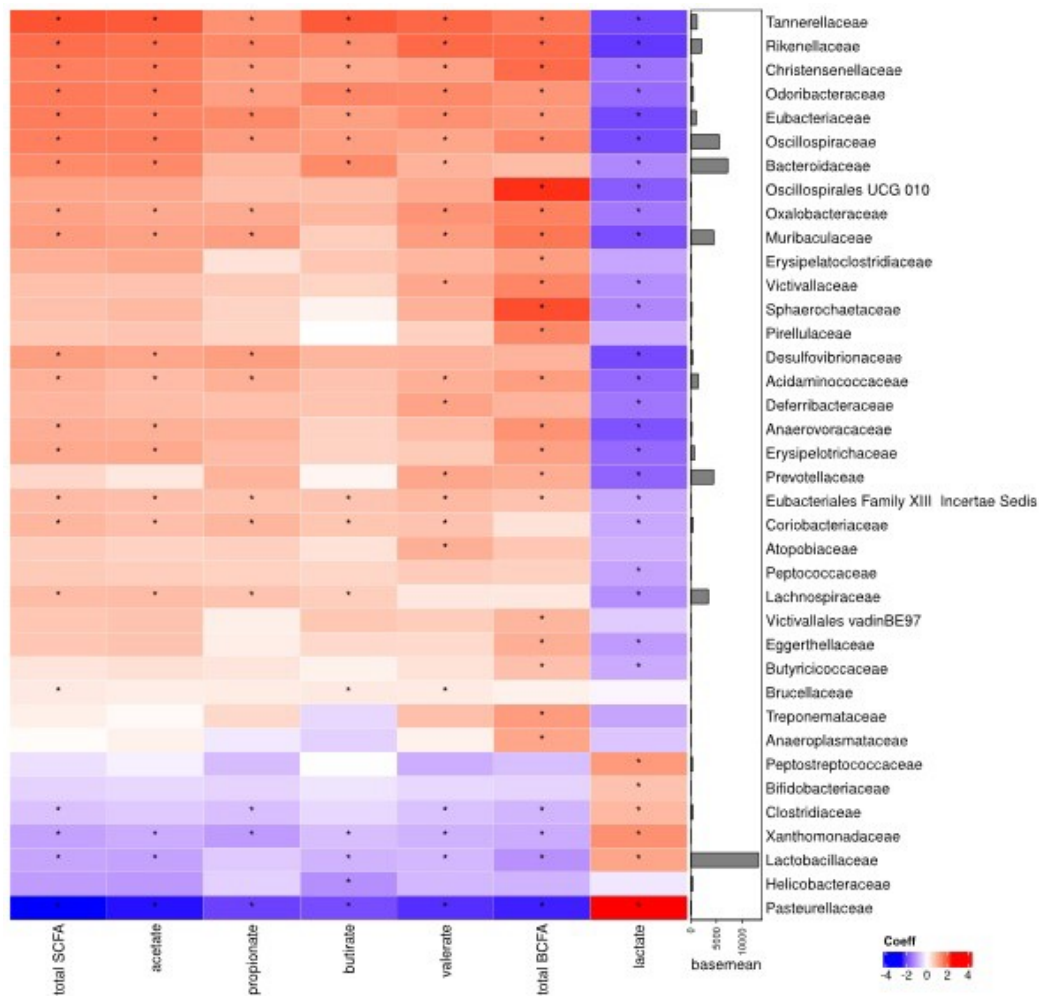

Supplement: d4fo00489b5.pdf [file d4fo00489b5.pdf]

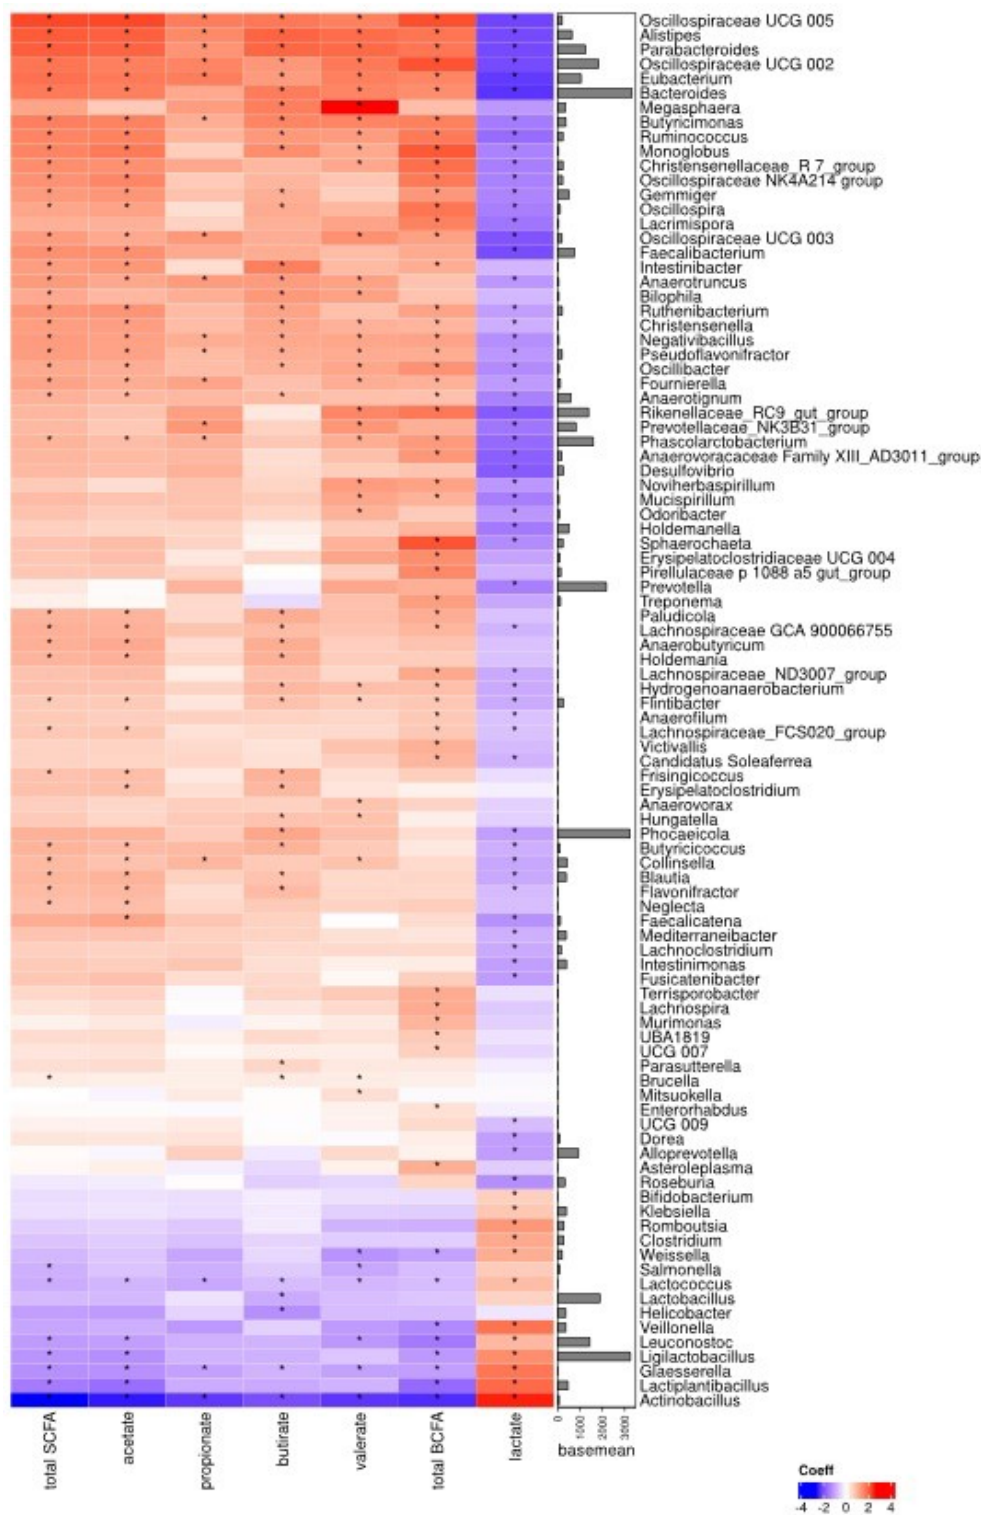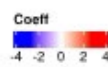

Supplement: d4fo00489b6.pdf [file d4fo00489b6.pdf]

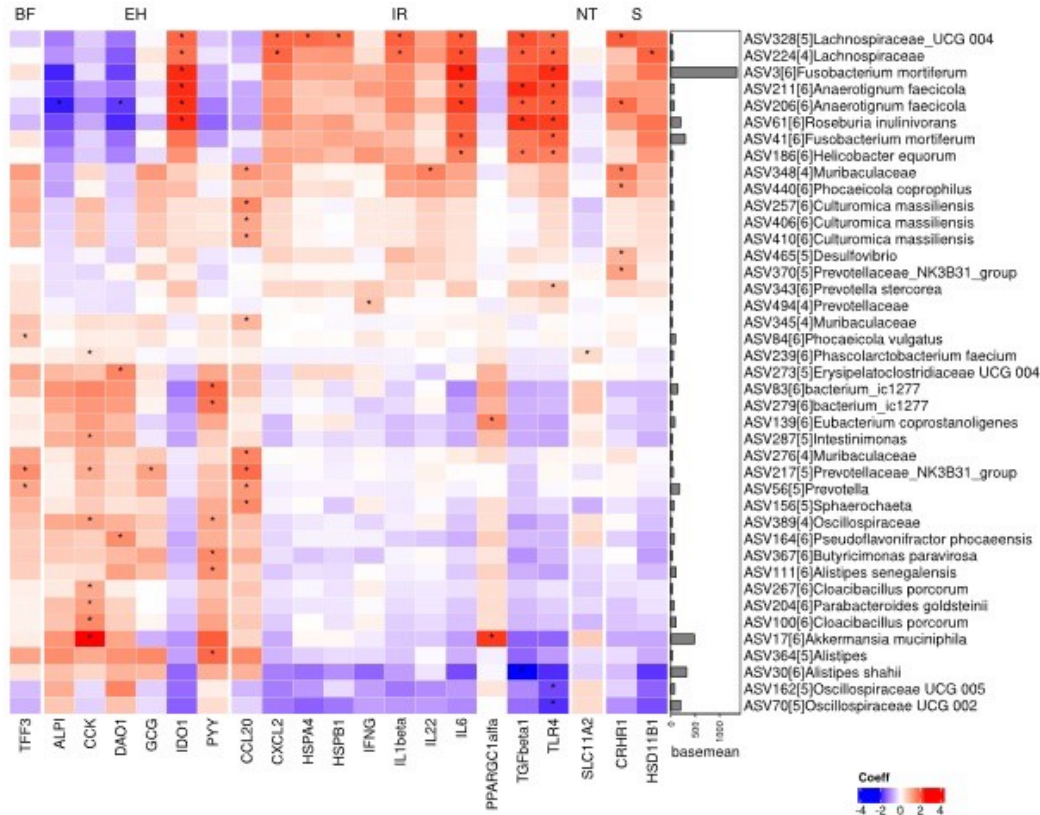

Supplement: d4fo00489b7.pdf [file d4fo00489b7.pdf]

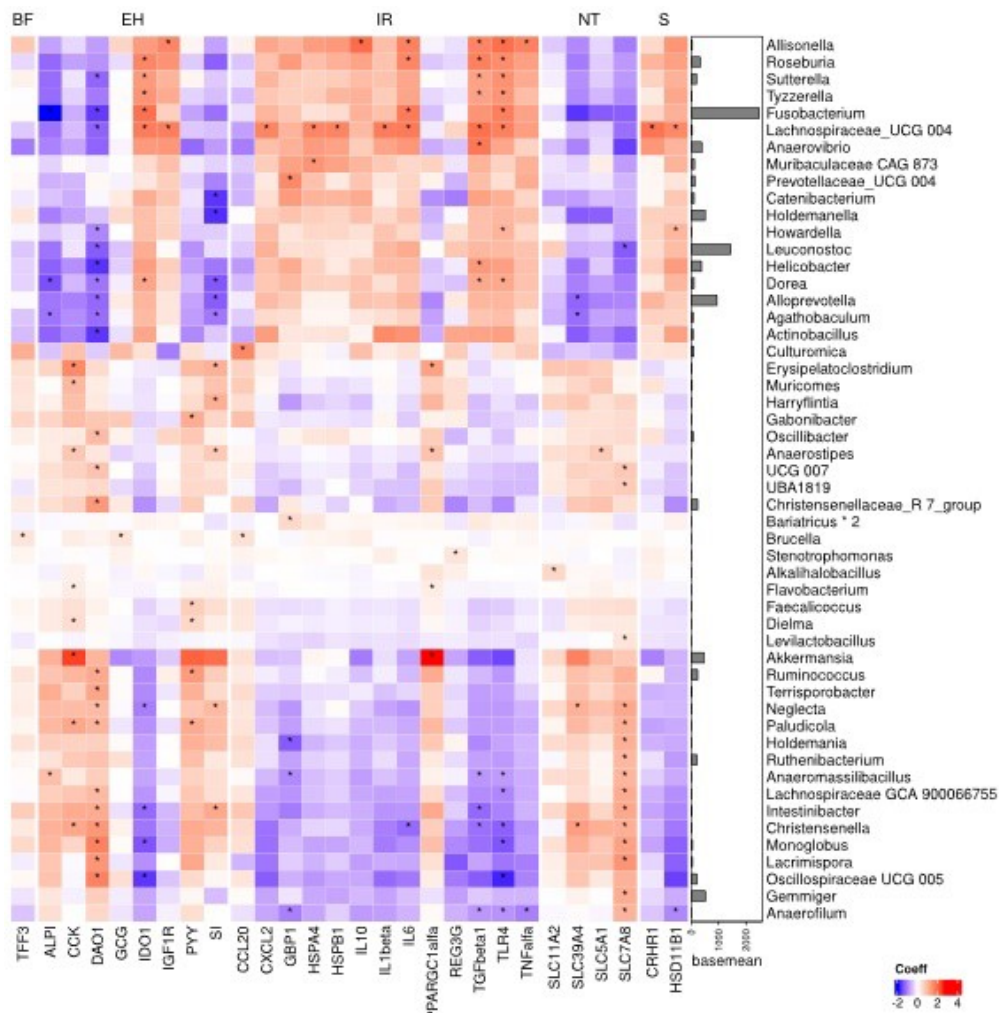

Supplement: d4fo00489b8.pdf [file d4fo00489b8.pdf]

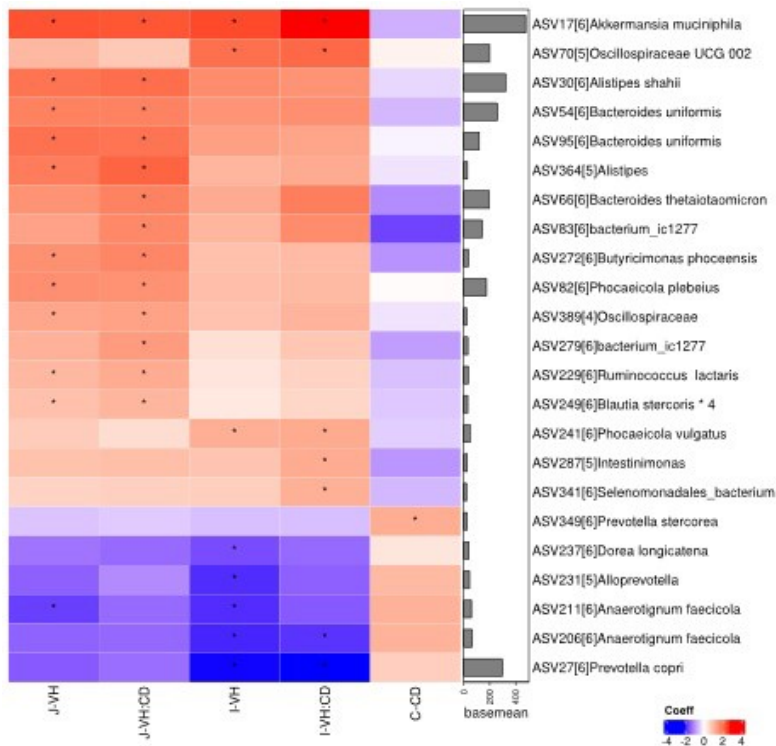

Supplement: d4fo00489b9.pdf [file d4fo00489b9.pdf]
